# Supplementary material for: Symmetrical and unsymmetrical Brønsted acidic ionic liquids for the effective conversion of fructose to 5-hydroxymethyl furfural
Source: Royal Society of Chemistry journal article supplement (doi:10.1039/c2cy20493b), 2012-09-12

## Electronic Supplementary Material

### **Symmetrical and Unsymmetrical Bronsted acidic ionic liquids for the effective conversion of Fructose to 5-Hydroxymethyl furfural**

Deepali A. Kotadia, Saurabh S. Soni\*

#### **1. Characterization of Ionic liquids**

- $^1\text{H}$  and  $^{13}\text{C}$  NMR of [MMIM]  $\text{HSO}_4$  (Figure S1)
- $^1\text{H}$  and  $^{13}\text{C}$  NMR of [MMBIM]  $\text{HSO}_4$  (Figure S2)
- $^1\text{H}$  and  $^{13}\text{C}$  NMR of [HMBIM]  $\text{HSO}_4$  (Figure S3)
- $^1\text{H}$  and  $^{13}\text{C}$  NMR of [PSMBIM]  $\text{HSO}_4$  (Figure S4)
- TGA of [MMIM]  $\text{HSO}_4$  (Figure S5)
- TGA of [MMBIM]  $\text{HSO}_4$  (Figure S6)
- TGA of [PSMBIM]  $\text{HSO}_4$  (Figure S7)
- TGA of [HMBIM]  $\text{HSO}_4$  (Figure S8)

#### **2. Identification and Characterization of 5-Hydroxymethylfurfural**

- GC-MS of 5-Hydroxymethyl furfural (Figure S9)
- HPLC measurement using UV and RI detector (Figure S10)
- $^1\text{H}$  and  $^{13}\text{C}$  NMR of HMF (Figure S11)

## The $^1\text{H}$ and $^{13}\text{C}$ NMR of synthesized Ionic liquids

$^1\text{H}$  NMR of [MMIM]  $\text{HSO}_4^-$  (Figure S1)

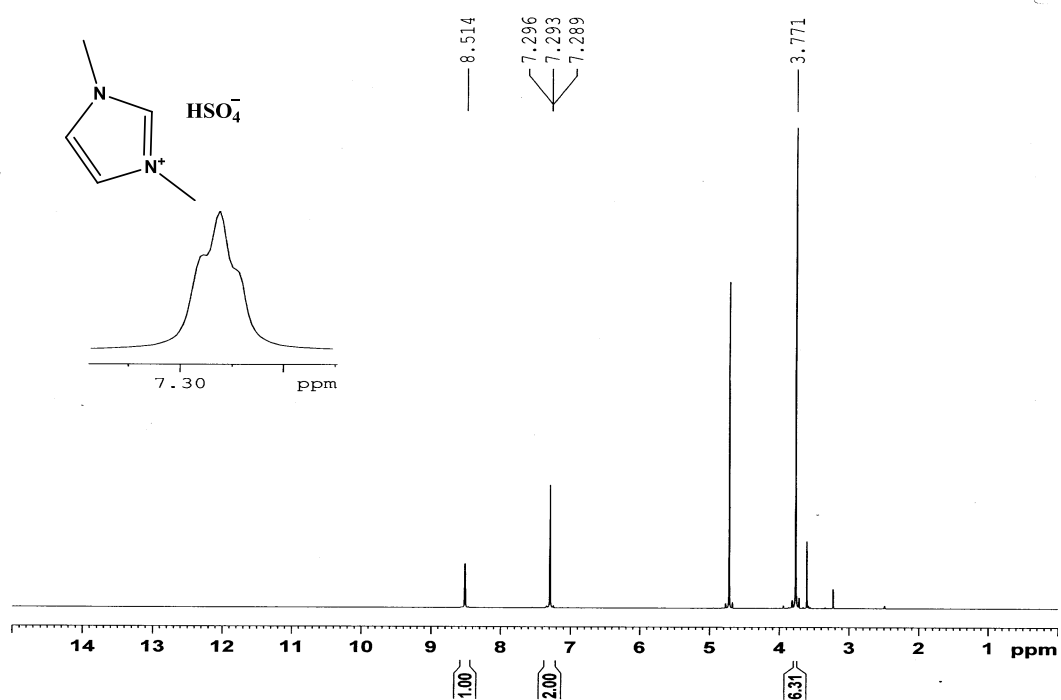

$^{13}\text{C}$  NMR of [MMIM]  $\text{HSO}_4^-$

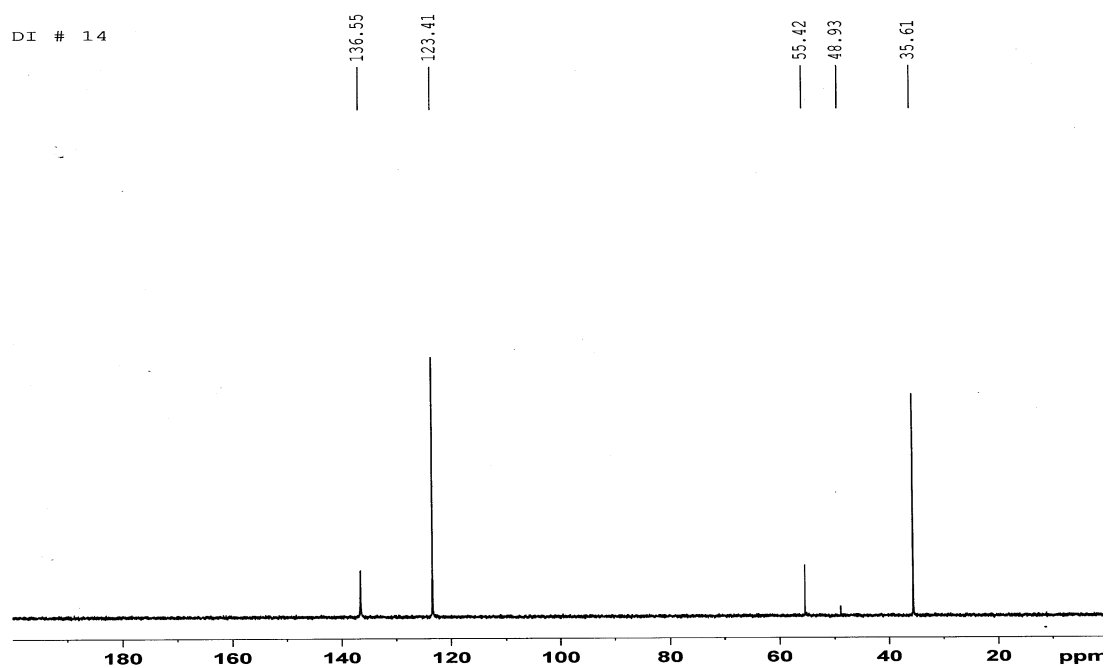

$^1\text{H}$  NMR of [MMBIM]  $\text{HSO}_4$  (Figure S2)

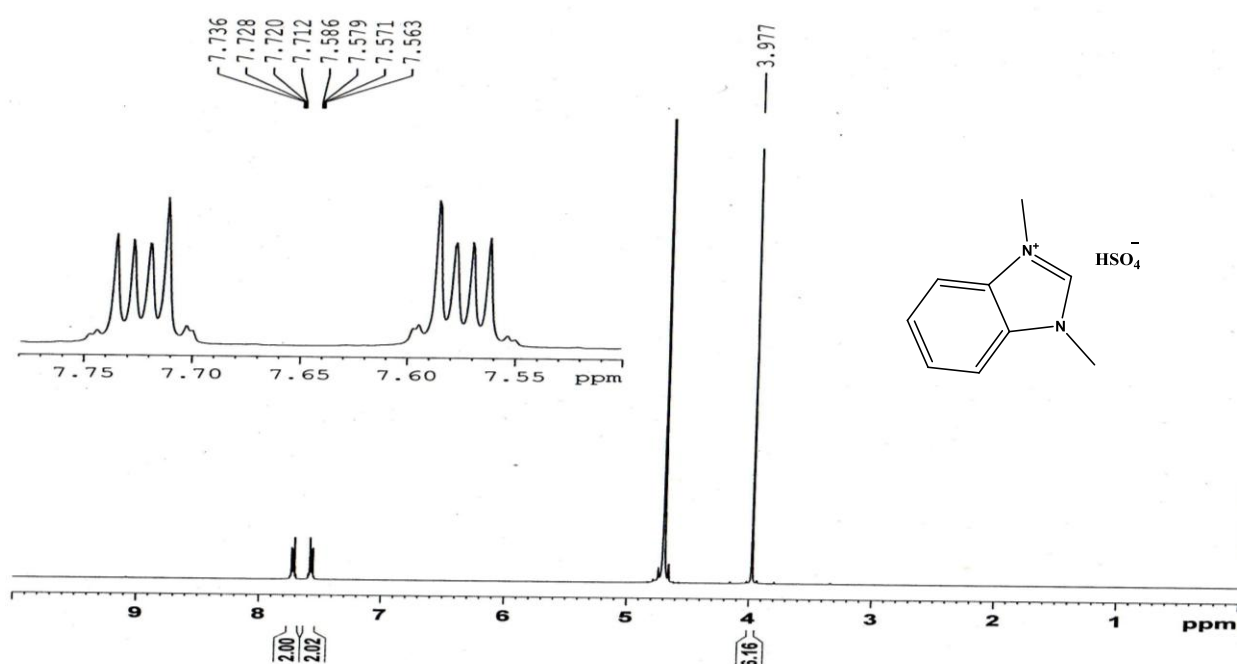

$^{13}\text{C}$  NMR of [MMBIM]  $\text{HSO}_4$

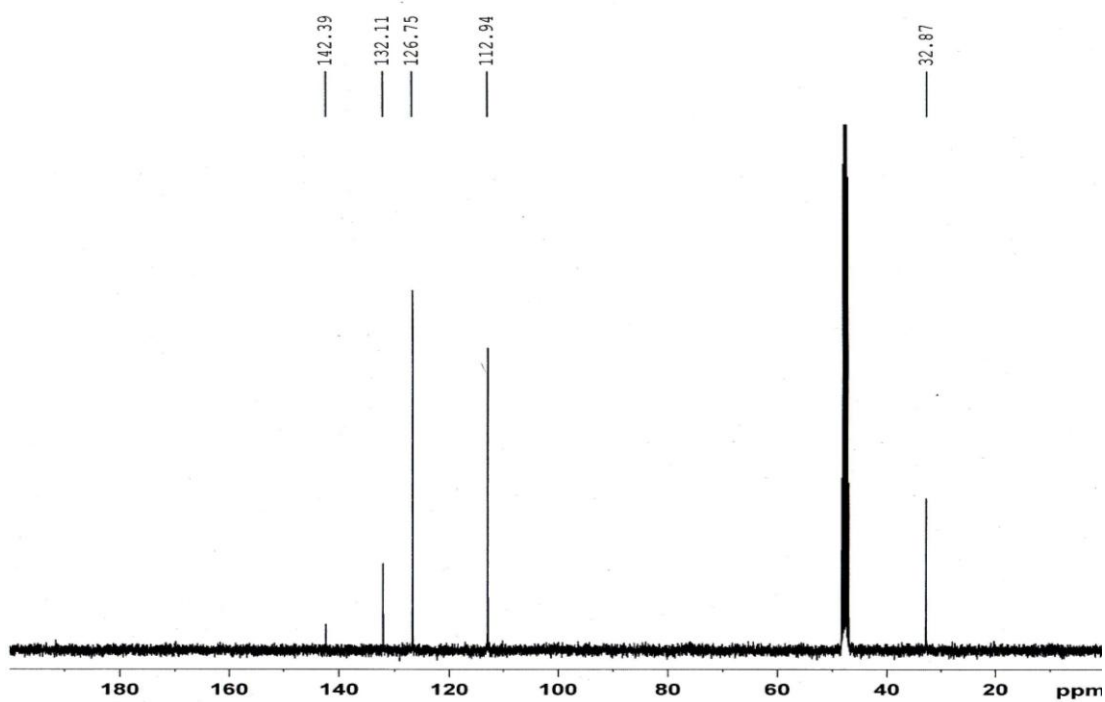

# <sup>1</sup>H NMR of [HMBIM] HSO<sub>4</sub> (Figure S3)

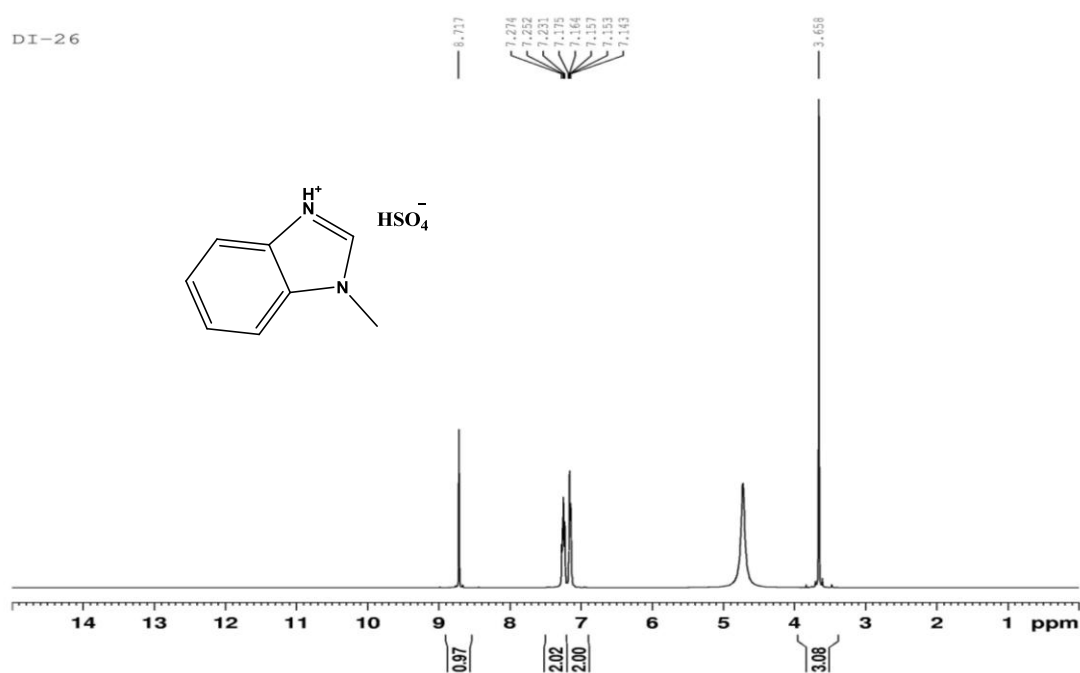

## <sup>13</sup>C NMR of [HMBIM] HSO<sub>4</sub>

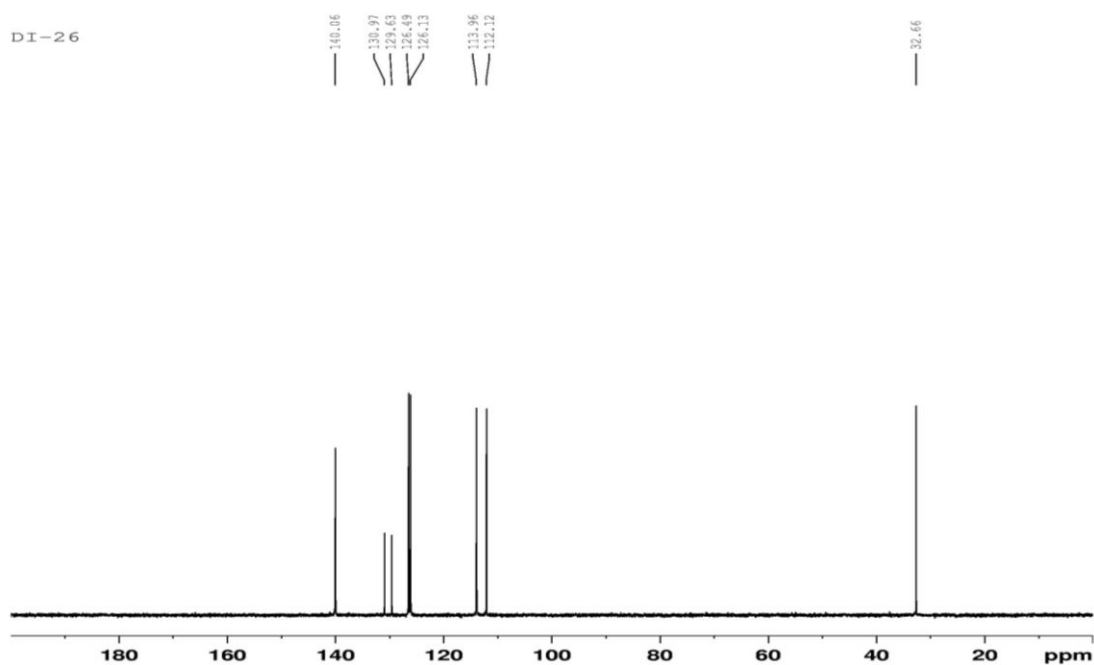

$^1\text{H}$  NMR of [PSMBIM]  $\text{HSO}_4$  (Figure S4)

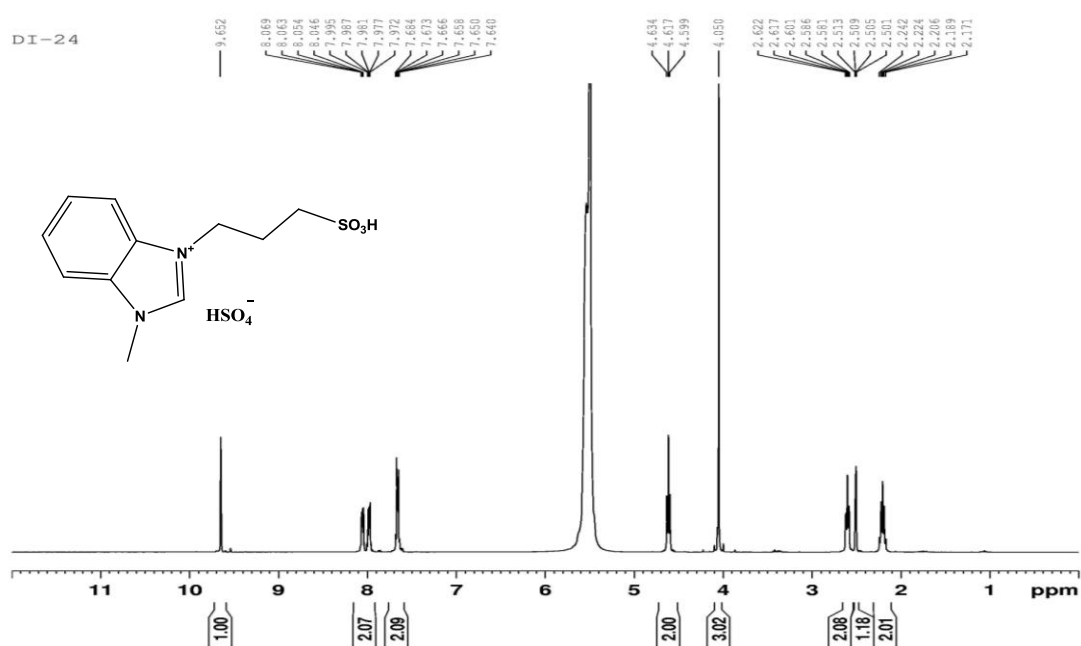

$^{13}\text{C}$  NMR of [PSMBIM]  $\text{HSO}_4$

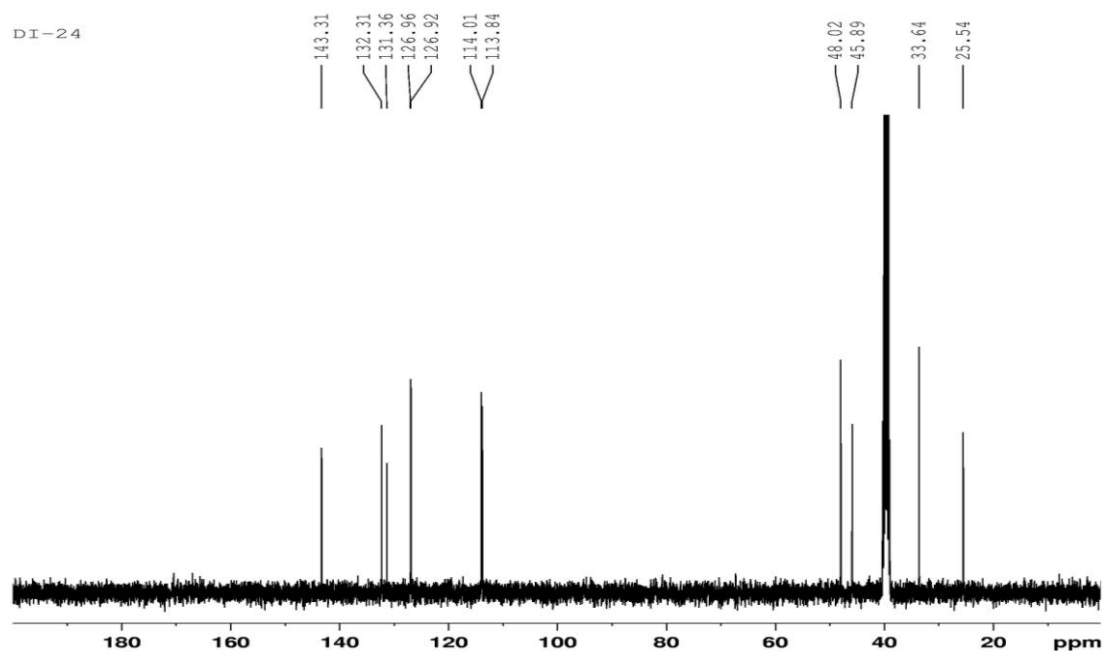

## Thermogravimetric analysis graph

[MMIM] HSO<sub>4</sub> (Figure S5)

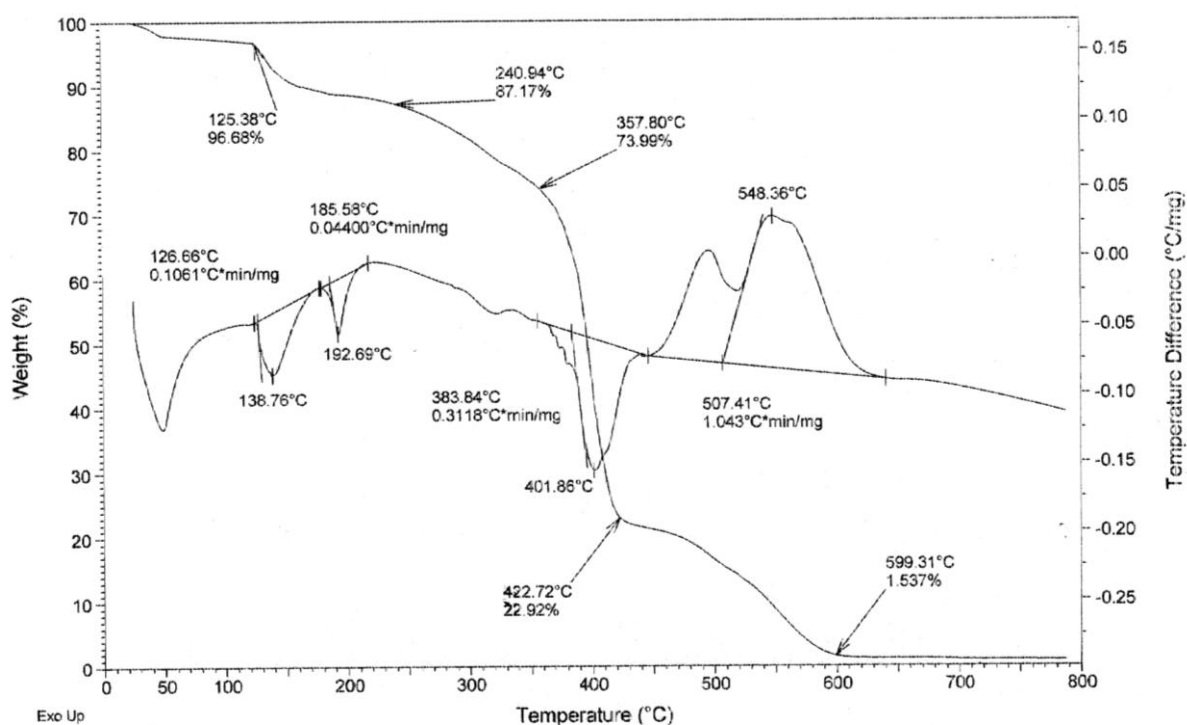

[MMBIM] HSO<sub>4</sub> (Figure S6)

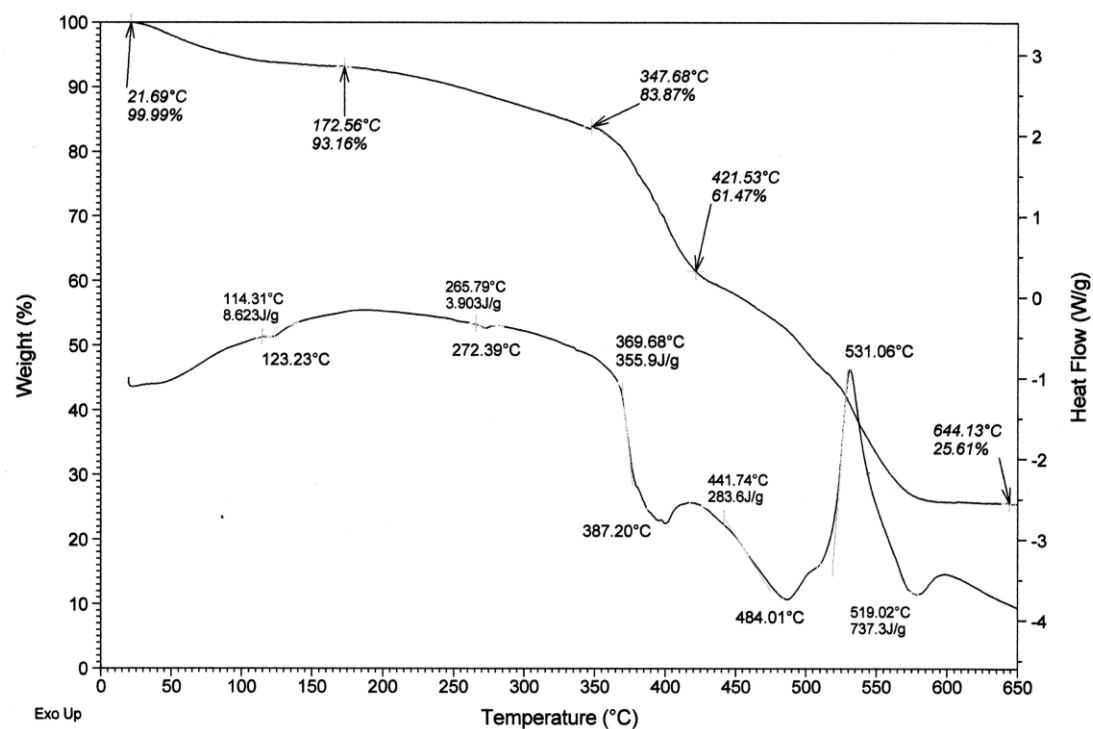

[HMBIM] HSO<sub>4</sub> (Figure S7)

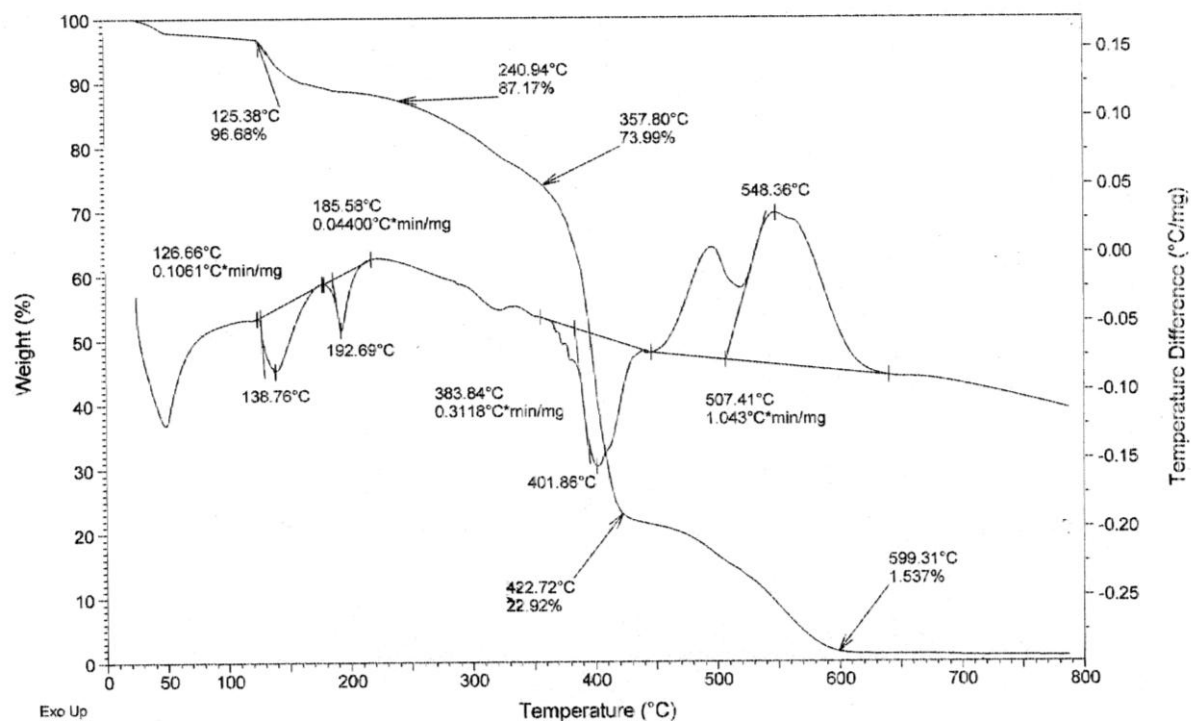

[PSMBIM] HSO<sub>4</sub> (Figure S8)

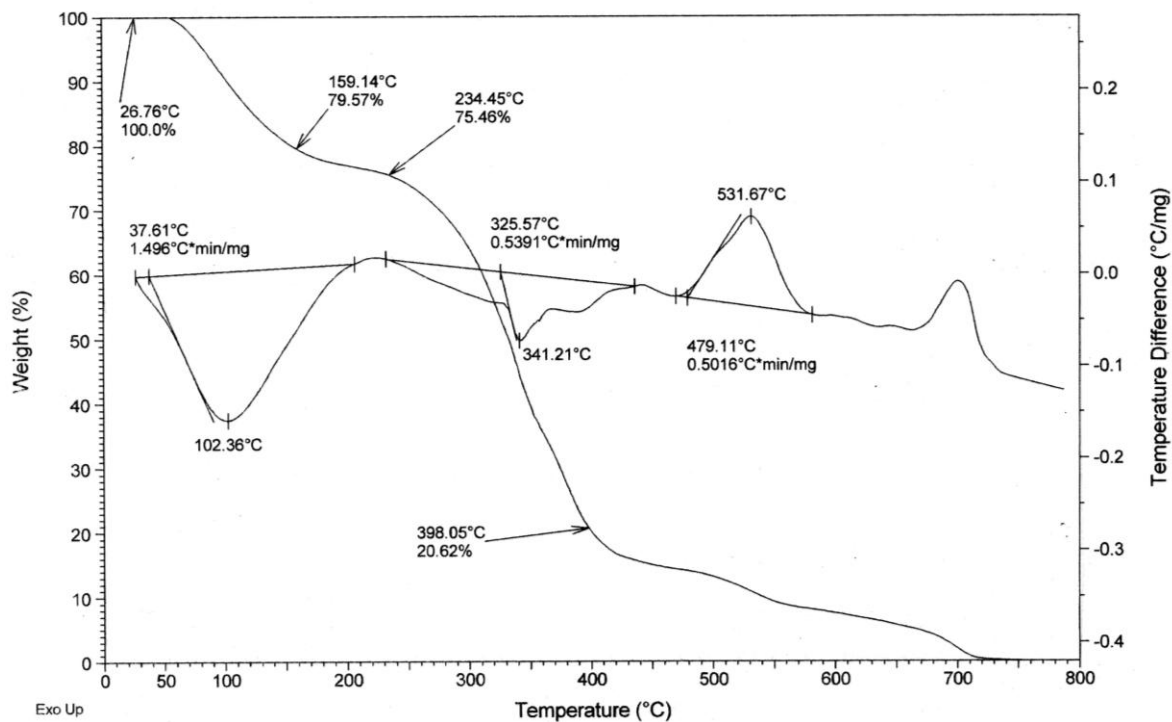

**Identification and Characterization of 5-Hydroxymethylfurfural**

GC-MS of 5-Hydroxymethyl furfural (**Figure S9**)

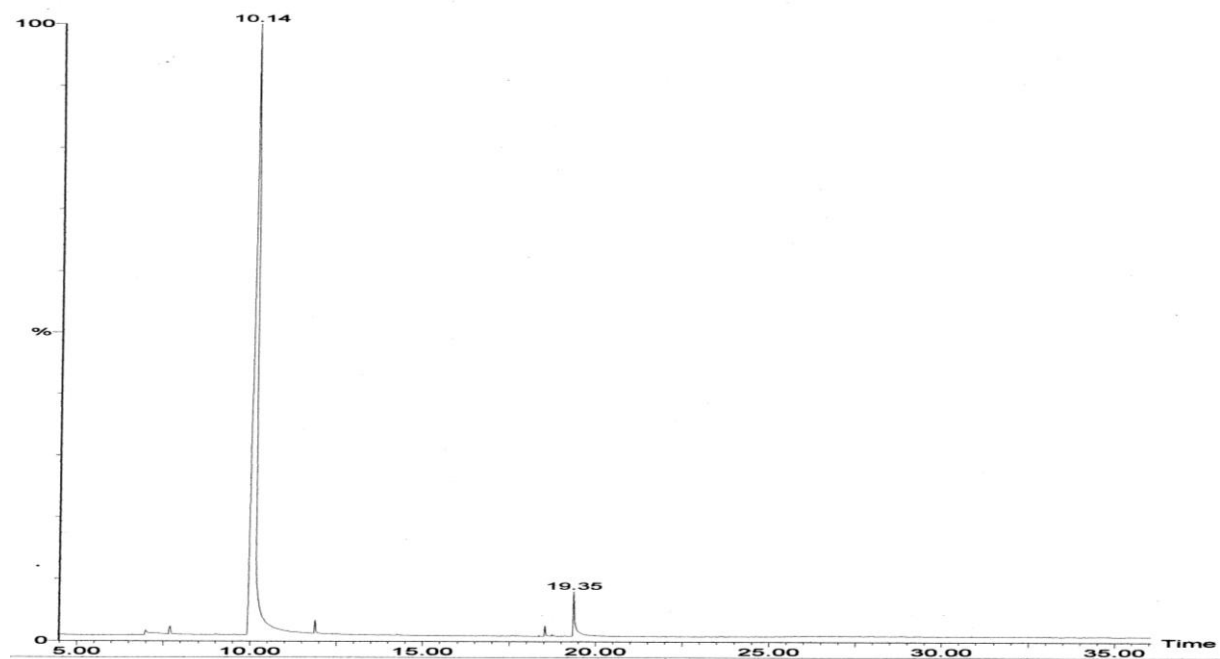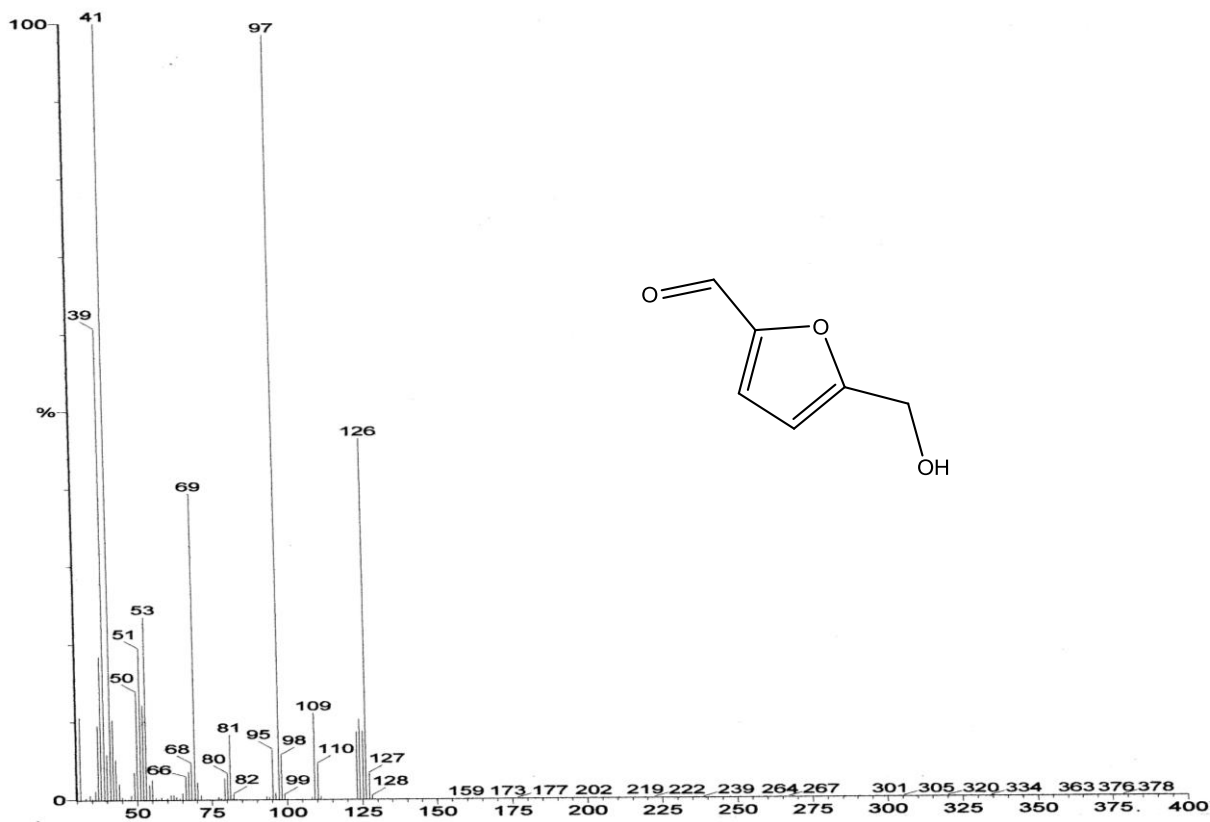



### HPLC-UV of 5-Hydroxymethyl furfural (**Figure S10**)

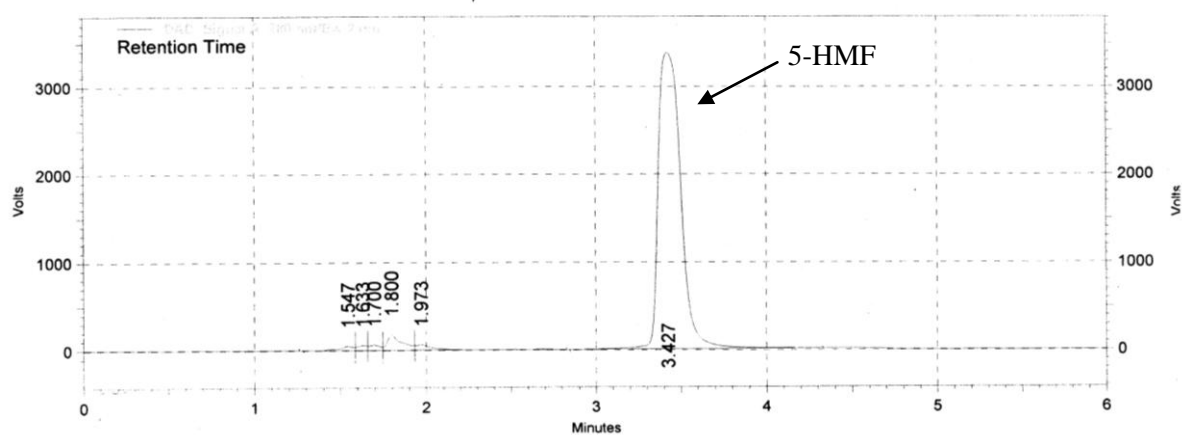

### HPLC-RI of 5-Hydroxymethyl furfural

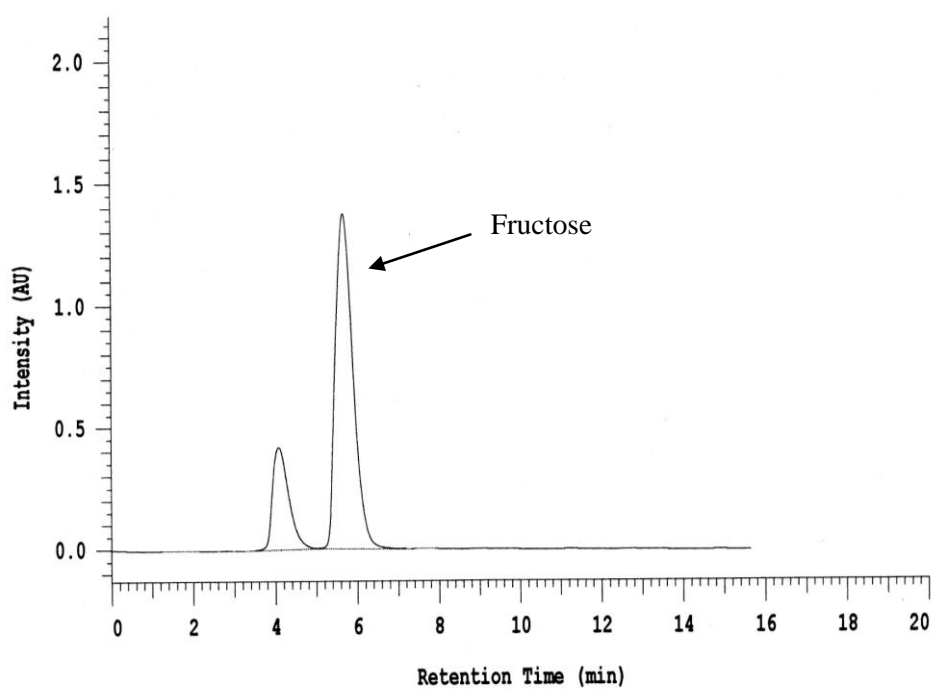

<sup>1</sup>H NMR of 5-HMF (**Figure S11**)

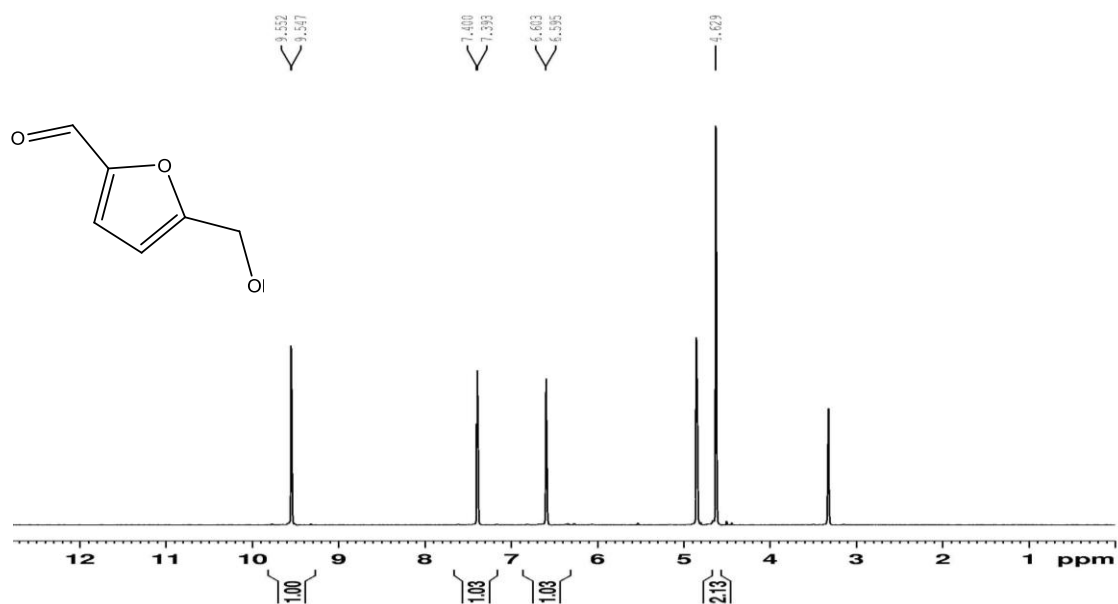

<sup>13</sup>C NMR of 5-HMF

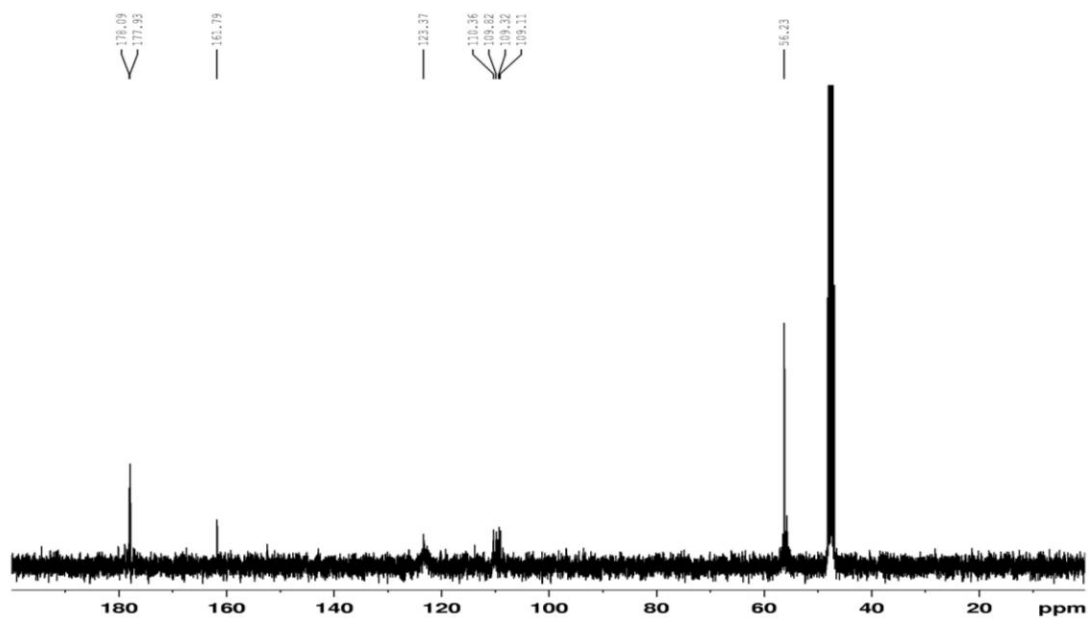

Supplement: c2cy20493b.pdf [file c2cy20493b.pdf]
